# Supplementary material for: New Tricks with an Old Sponge: Feature-Based Molecular Networking Led to Fast Identification of New Stylissamide L from Stylissa caribica
Source: MDPI journal article supplement (doi:10.3390/md18090443), 2020-08-27
Supplement: s1 [file s1]

## Supplementary Material

**Table S1.** Cyclic heptapeptides in the sponge *Stylissa caribica*.

**Table S2.** Full NMR data of stylissamide L (**1**) ( $^1\text{H}$  700 MHz,  $^{13}\text{C}$  175 MHz,  $\text{DMSO-}d_6$ ).

**Table S3.** Links to LC-MS data and molecular networks.

**Figure S1.** Molecular networks obtained using (a) the program MetGem (b) the Metabolomics workflow on GNPS, and (g) the Feature-Based Molecular Network workflow on GNPS.

**Figure S2.** Positive ion mode high-resolution ESI mass spectrum of stylissamide L (**1**).

**Figure S3.** Positive ion mode high-resolution ESI MS/MS spectrum of stylissamide L (**1**).

**Figure S4.**  $^1\text{H}$ -NMR spectrum of stylissamide L (**1**) (700 MHz,  $\text{DMSO-}d_6$ ).

**Figure S5.**  $^{13}\text{C}$ -NMR spectrum of stylissamide L (**1**) (175 MHz,  $\text{DMSO-}d_6$ ).

**Figure S6.** COSY spectrum of stylissamide L (**1**) (700 MHz,  $\text{DMSO-}d_6$ ).

**Figure S7.** TOCSY spectrum of stylissamide L (**1**) (700 MHz,  $\text{DMSO-}d_6$ ).

**Figure S8.** Spin systems of stylissamide L (**1**) from the sections of the TOCSY spectrum.

**Figure S9.** NOESY spectrum of stylissamide L (**1**) (700 MHz,  $\text{DMSO-}d_6$ ).

**Figure S10.** HSQC spectrum of stylissamide L (**1**) (700 MHz,  $\text{DMSO-}d_6$ ).

**Figure S11.** HMBC spectrum of stylissamide L (**1**) (700 MHz,  $\text{DMSO-}d_6$ ).

**Figure S12.** Band-selective HMBC spectrum of stylissamide L (**1**) (700 MHz,  $\text{DMSO-}d_6$ ).

**Figure S13.** UV and ECD spectra of stylissamide L (**1**) in ACN.

**Figure S14.** Real time monitoring of cancer cell proliferation after exposure to stylissamide L (**1**).

**Figure S15.** Real-time monitoring of 3AB-OS and MCF-7 cell migration after exposure to stylissamide L (**1**).

**Table S1.** Cyclic heptapeptides in the sponge *Stylissa caribica*.

| Cyclic peptide    | [M+H] <sup>+</sup>                                               | Exact Mass | Retention time     | Retention time   | Citation       |
|-------------------|------------------------------------------------------------------|------------|--------------------|------------------|----------------|
|                   |                                                                  |            | RP-18 <sup>a</sup> | PFP <sup>b</sup> |                |
| Stylissamide A    | C <sub>44</sub> H <sub>61</sub> N <sub>8</sub> O <sub>9</sub>    | 845.4556   | 1.72               | 26.34            | <i>c,d,e</i>   |
| Stylissamide B    | C <sub>44</sub> H <sub>58</sub> N <sub>7</sub> O <sub>8</sub>    | 812.4341   | ND                 | ND               | <i>c,d,e</i>   |
| Stylissamide C    | C <sub>48</sub> H <sub>60</sub> N <sub>7</sub> O <sub>8</sub>    | 862.4498   | 20.29              | 32.66            | <i>c,d,e</i>   |
| Stylissamide D    | C <sub>45</sub> H <sub>62</sub> N <sub>7</sub> O <sub>8</sub>    | 828.4654   | 19.55              | 32.48            | <i>c,d,e</i>   |
| Stylissamide E    | C <sub>39</sub> H <sub>59</sub> N <sub>8</sub> O <sub>9</sub>    | 783.4400   | 13.29              | 28.76            | <i>d,e</i>     |
| Stylissamide F    | C <sub>43</sub> H <sub>57</sub> N <sub>10</sub> O <sub>9</sub>   | 857.4304   | 13.94              | 32.21            | <i>d,e</i>     |
| Stylissamide G    | C <sub>45</sub> H <sub>62</sub> N <sub>7</sub> O <sub>7</sub>    | 812.4705   | ND                 | ND               | <i>e</i>       |
| Stylissamide H    | C <sub>44</sub> H <sub>59</sub> N <sub>8</sub> O <sub>8</sub>    | 827.4450   | ND                 | ND               | <i>e</i>       |
| Stylissamide L    | C <sub>41</sub> H <sub>53</sub> N <sub>8</sub> O <sub>10</sub>   | 817.3876   | 6.21               | 24.95            | this work      |
| Hymenamide C      | C <sub>43</sub> H <sub>55</sub> N <sub>8</sub> O <sub>9</sub>    | 827.4087   | 20.71              | 32.58            | <i>f</i>       |
| Hymenamide F      | C <sub>35</sub> H <sub>61</sub> N <sub>10</sub> O <sub>8</sub> S | 781.4389   | 1.67               | 26.40            | <i>f</i>       |
| Phakellistatin 3  | C <sub>42</sub> H <sub>55</sub> N <sub>8</sub> O <sub>9</sub>    | 815.4087   | 18.50              | 31.89            | <i>h</i>       |
| Phakellistatin 13 | C <sub>42</sub> H <sub>55</sub> N <sub>8</sub> O <sub>8</sub>    | 799.4137   | 20.09              | 32.47            | <i>g</i>       |
| Stylisin 1        | C <sub>45</sub> H <sub>62</sub> N <sub>7</sub> O <sub>8</sub>    | 828.4654   | ND                 | ND               | <i>c,d,e,g</i> |
| Stylisin 2        | C <sub>44</sub> H <sub>58</sub> N <sub>7</sub> O <sub>8</sub>    | 812.4341   | ND                 | ND               | <i>c,d,e,g</i> |

- a.* Experiments were performed with a Kinetex 5  $\mu$ m, 50 mm  $\times$  2.10 mm C18 column using a flow rate of 200  $\mu$ L/min and the following elution gradient: 10% MeOH for 1 min, 10%–100% MeOH over 30 min, and 100% MeOH for 10 min.
- b.* Experiments were performed with a Kinetex 5  $\mu$ m, 100 mm  $\times$  2.1 mm PFP column using a flow rate of 200  $\mu$ L/min and the same elution gradient of H<sub>2</sub>O and MeOH described above.
- c.* Schmidt, G.; Grube, A.; Köck, M. Stylissamides A-D - New proline-containing cyclic heptapeptides from the marine sponge *Stylissa caribica*. *European J. Org. Chem.* **2007**, *2*, 4103–4110, doi:10.1002/ejoc.200700013.
- d.* Cychon C.; Köck, M. Stylissamides E and F, Cyclic Heptapeptides from the Caribbean Sponge *Stylissa caribica*. *J. Nat. Prod.* **2010**, *73*, 738–742, doi: 10.1021/np900664f.
- e.* Wang, X.; Morinaka, B. I.; Molinski, T. F. Structures and solution conformational dynamics of stylissamides G and H from the Bahamian Sponge *Stylissa caribica*. *J. Nat. Prod.* **2014**, *77*, 625–630, doi:10.1021/np400891s.
- f.* Grube, A.; Maier, T.; Köck, M. MS-guided Fractionation as a Fast Way to the Identification of New Natural Products – MALDI-TOF-MS Screening of the Marine Sponge *Stylissa caribica*. *Zeitschrift für Naturforsch. B* **2007**, *62*, 600–604, doi:10.1515/znb-2007-0420..
- g.* Mohammed, R.; Peng, J.; Kelly, M.; Hamann, M.T. Cyclic heptapeptides from the Jamaican sponge *Stylissa caribica*. *J. Nat. Prod.* **2006**, *69*, 1739–1744, doi:10.1021/np060006n.
- h.* This compound was not previously detected in specimens of *Stylissa caribica*. It was putatively identified by the Dereplicator tool in GNPS.

Table S2. Full NMR data of stylissamide L (1) (<sup>1</sup>H 700 MHz, <sup>13</sup>C 175 MHz, DMSO-*d*<sub>6</sub>).

| AA                 | pos.              | δ <sub>c</sub> , type | δ <sub>H</sub> , mult ( <i>J</i> in Hz)                                        | NOESY                                                                                                                                  | HMBC                                           |
|--------------------|-------------------|-----------------------|--------------------------------------------------------------------------------|----------------------------------------------------------------------------------------------------------------------------------------|------------------------------------------------|
| Pro <sup>I</sup>   | 1                 | 170.3, C              | -                                                                              |                                                                                                                                        |                                                |
|                    | 2                 | 59.1, CH              | 4.34, dd (5.1, 8.6)                                                            | Ser-NH, Tyr-NH, Phe-NH                                                                                                                 | Phe-1                                          |
|                    | 3                 | 28.1, CH <sub>2</sub> | a 2.15, m<br>b 1.75, m                                                         | Pro <sup>II</sup> -4b, Pro <sup>II</sup> -3a<br>Pro <sup>II</sup> -2, Pro <sup>II</sup> -4b                                            | Pro <sup>I</sup> -1<br>Pro <sup>I</sup> -1     |
|                    | 4                 | 24.3, CH <sub>2</sub> | 1.87, m                                                                        |                                                                                                                                        |                                                |
|                    | 5                 | 46.7, CH <sub>2</sub> | a 3.45, m<br>b 3.36, m                                                         |                                                                                                                                        | Phe-1, Pro <sup>I</sup> -2                     |
| Pro <sup>II</sup>  | 1                 | 171.8, C              | -                                                                              |                                                                                                                                        |                                                |
|                    | 2                 | 60.1, CH              | 4.28, dd (1.5, 8.8)                                                            | Ser-NH, Pro <sup>I</sup> -2, Pro <sup>I</sup> -3b                                                                                      | Pro <sup>II</sup> -1, Pro <sup>II</sup> -5     |
|                    | 3                 | 31.8, CH <sub>2</sub> | a 2.16, m<br>b 2.00, m                                                         | Ser-NH<br>Pro <sup>III</sup> -3a                                                                                                       | Pro <sup>II</sup> -1                           |
|                    | 4                 | 21.7, CH <sub>2</sub> | a 1.77, m<br>b 1.57, m                                                         |                                                                                                                                        |                                                |
|                    | 5                 | 46.8, CH <sub>2</sub> | a 3.60, ddd (1.5, 8.4, 10.8)<br>b 3.33, ddd (10.8, 10.8, 7.1)<br>7.65, d (5.9) | Ser-NH<br>Pro <sup>III</sup> -4b<br>Tyr-NH, Pro <sup>I</sup> -2, Pro <sup>II</sup> -2, Pro <sup>II</sup> -5a,<br>Pro <sup>II</sup> -4b | Pro <sup>I</sup> -1<br>Pro <sup>II</sup> -1    |
| Ser                | NH                |                       |                                                                                |                                                                                                                                        |                                                |
| Tyr                | 1                 | 167.7, C              | -                                                                              |                                                                                                                                        |                                                |
|                    | 2                 | 60.0, CH              | 3.85, ddd (3.6, 5.9, 10.2)                                                     | Tyr-NH                                                                                                                                 | Ser -1                                         |
|                    | 3                 | 60.9, CH <sub>2</sub> | a 3.46, dd (10.2, 11.9)<br>b 3.14, dd (11.9, 3.6)<br>7.34, d (9.1)             | Tyr-NH, Tyr-5/9                                                                                                                        |                                                |
|                    | NH                |                       |                                                                                | Ser-NH, Ser-3a                                                                                                                         | Ser-1                                          |
|                    | 1                 | 171.5 C               | -                                                                              |                                                                                                                                        |                                                |
| Pro <sup>III</sup> | 2                 | 51.5 CH               | 4.88 ddd (3.2, 9.1, 10.9)                                                      | Pro <sup>III</sup> -5a/b                                                                                                               | Tyr- 1                                         |
|                    | 3                 | 37.0 CH <sub>2</sub>  | a 3.35, dd (3.2, 13.5)<br>b 2.42, dd (10.9, 13.5)                              | Pro <sup>III</sup> -5a/b, Phe-NH, Gln-NH<br>Gln-NH, Phe-NH, Pro <sup>III</sup> -5a                                                     | Tyr-5/9<br>Tyr-1, Tyr-4                        |
|                    | 4                 | 126.6 C               | -                                                                              |                                                                                                                                        |                                                |
|                    | 5/9               | 130.5 CH              | 7.08, d (8.5)                                                                  | Tyr-3a, Tyr-3b                                                                                                                         | Tyr-7                                          |
|                    | 6/8               | 114.9 CH              | 6.66, d (8.5)                                                                  |                                                                                                                                        | Tyr-7                                          |
| Gln                | 7                 | 156.0 C               | -                                                                              |                                                                                                                                        |                                                |
|                    | 7-OH              |                       | 7.42, s                                                                        |                                                                                                                                        |                                                |
|                    | 1                 | 171.9, C              | -                                                                              |                                                                                                                                        |                                                |
|                    | 2                 | 63.1, CH              | 4.06, t (8.7)                                                                  | Phe-NH,                                                                                                                                | Pro <sup>III</sup> -1                          |
|                    | 3                 | 28.7, CH <sub>2</sub> | a 2.22 m<br>b 1.81, m                                                          | Gln-NH                                                                                                                                 | Pro <sup>III</sup> - 1                         |
| Phe                | 4                 | 25.0, CH <sub>2</sub> | a 2.11, m<br>b 1.98, m                                                         | Gln-NH, Gln-3a, Gln-3b                                                                                                                 |                                                |
|                    | 5                 | 46.9, CH <sub>2</sub> | a 3.93, ddd (6.8, 9.8, 9.8)<br>b 3.82, m<br>8.17, d (7.0)                      | Tyr-2, Tyr-3a<br>Tyr-2, Gln-NH, Tyr-3a<br>Phe-NH, Tyr-3a, Pro <sup>III</sup> -2,<br>Pro <sup>III</sup> -3b, Pro <sup>III</sup> -4a     | Pro <sup>III</sup> -3<br>Pro <sup>III</sup> -1 |
|                    | NH                |                       |                                                                                |                                                                                                                                        |                                                |
|                    | 1                 | 170.7, C              | -                                                                              |                                                                                                                                        |                                                |
|                    | 2                 | 52.8, CH              | 4.05, ddd (4.3, 7.0, 10.0)                                                     | Phe-NH, Pro <sup>III</sup> -4b                                                                                                         | Gln-1                                          |
| Phe                | 3                 | 25.9, CH <sub>2</sub> | a 1.85, m<br>b 1.73, m                                                         | Pro <sup>III</sup> -4a<br>Pro <sup>III</sup> - 4a                                                                                      | Gln-1, Gln-5<br>Gln-5                          |
|                    | 4                 | 31.5, CH <sub>2</sub> | a 2.13, ddd (7.2, 15.7, 7.2)<br>b 2.04, ddd (7.2, 15.7, 7.2)                   | Pro <sup>III</sup> -5b, Pro <sup>III</sup> -3a, Pro <sup>III</sup> -3b<br>Pro <sup>III</sup> -4a                                       | Gln-5<br>Gln-5                                 |
|                    | 5                 | 174.5, C              | -                                                                              |                                                                                                                                        |                                                |
|                    | 5-NH <sub>2</sub> |                       | 6.92, s                                                                        | Gln-4a, Gln-4b                                                                                                                         | Gln-5                                          |
|                    | NH                |                       | 7.11, d (7.2)                                                                  | Phe-2, Gln-NH, Pro <sup>III</sup> -2, Pro <sup>I</sup> -5b,<br>Tyr-NH                                                                  | Gln-1                                          |
| Phe                | 1                 | 167.5 C               | -                                                                              |                                                                                                                                        |                                                |
|                    | 2                 | 51.5, CH              | 4.69, ddd (5.8, 7.2, 8.0)                                                      | Pro <sup>I</sup> -5a, Pro <sup>I</sup> -5b                                                                                             | Phe-1, Phe-4                                   |
|                    | 3                 | 36.9 CH <sub>2</sub>  | a 3.18, dd (8.0, 14.2)<br>b 2.71 (5.8, 14.2)                                   |                                                                                                                                        | Phe-1, Phe-4<br>Phe-1, Phe-5/9                 |
|                    | 4                 | 138.0, C              | -                                                                              |                                                                                                                                        |                                                |
|                    | 5/9               | 128.9, CH             | 7.16, d (7.5)                                                                  |                                                                                                                                        |                                                |
| Phe                | 6/8               | 126.0, CH             | 7.18, t (7.3)                                                                  |                                                                                                                                        |                                                |
|                    | 7                 | 128.0, CH             | 7.22, t (7.5)                                                                  |                                                                                                                                        |                                                |

Table S3. Links to LC-MS data and molecular networks.

| Description                                            | Link                                                                                                                                                                                                                                                                    |
|--------------------------------------------------------|-------------------------------------------------------------------------------------------------------------------------------------------------------------------------------------------------------------------------------------------------------------------------|
| Classical Molecular Networking (Metabolomics) workflow | <a href="https://gnps.ucsd.edu/ProteoSAFe/status.jsp?task=4acb49028d7041c39fccf03dd6e8c195">https://gnps.ucsd.edu/ProteoSAFe/status.jsp?task=4acb49028d7041c39fccf03dd6e8c195</a>                                                                                       |
| Feature-Based Molecular Networking workflow            | <a href="https://gnps.ucsd.edu/ProteoSAFe/status.jsp?task=db7aa9e8bec64d6290cc040254f00b87">https://gnps.ucsd.edu/ProteoSAFe/status.jsp?task=db7aa9e8bec64d6290cc040254f00b87</a>                                                                                       |
| Dereplicator                                           | <a href="https://gnps.ucsd.edu/ProteoSAFe/status.jsp?task=f8b123b5ea89494481549c1a519caf5d">https://gnps.ucsd.edu/ProteoSAFe/status.jsp?task=f8b123b5ea89494481549c1a519caf5d</a>                                                                                       |
| LC-MS data on Massive                                  | <a href="https://massive.ucsd.edu/ProteoSAFe/dataset.jsp?task=f77c49cb5d73489583c08d3e66b558e1">https://massive.ucsd.edu/ProteoSAFe/dataset.jsp?task=f77c49cb5d73489583c08d3e66b558e1</a><br>FTP access: ftp://MSV000085904@massive.ucsd.edu<br>password: Sty_reviewers |

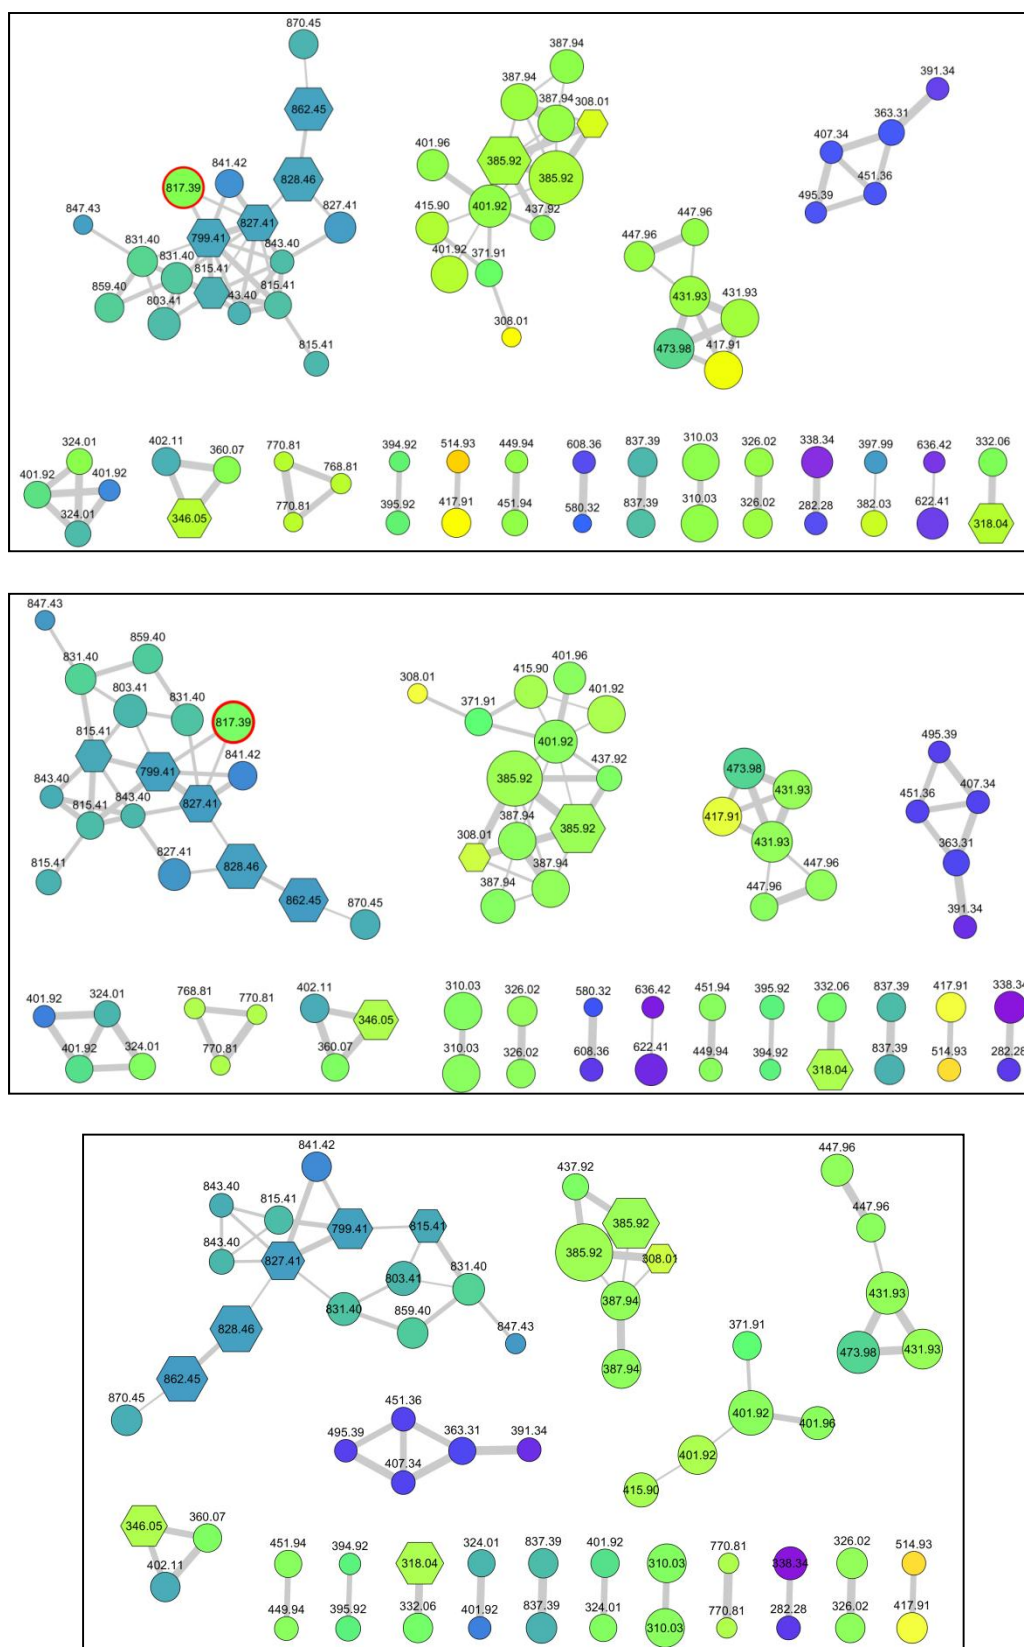

Figure S1. Molecular networks of the extract of *S. caribica* obtained with the same data and the same parameters ( $m/z$  tolerance 0.01 Da, cosine score > 0.55, matched peaks > 8, maximum number of neighbor nodes = 10) using (a) the program MetGem (b) the Metabolomics workflow on GNPS, and (c) the Feature-Based Molecular Network workflow on GNPS.

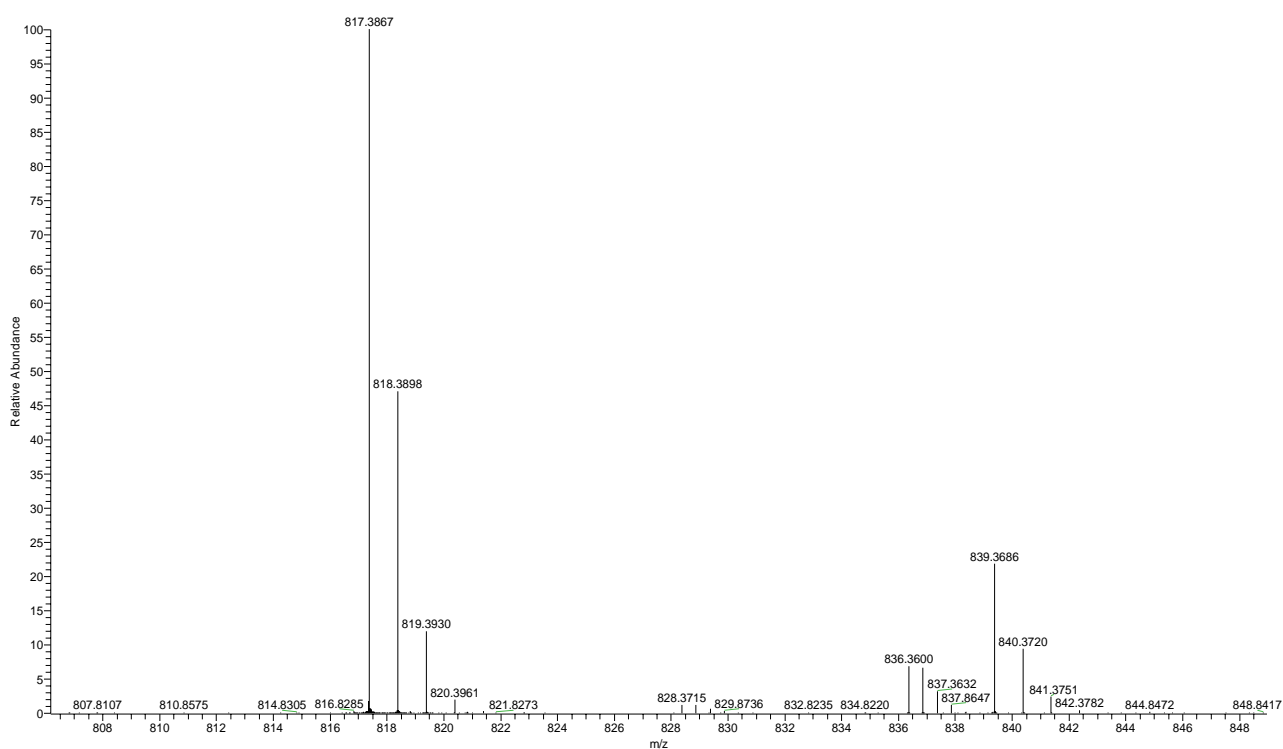

Figure S2. Positive ion mode high-resolution ESI mass spectrum of stylissamide L (1).

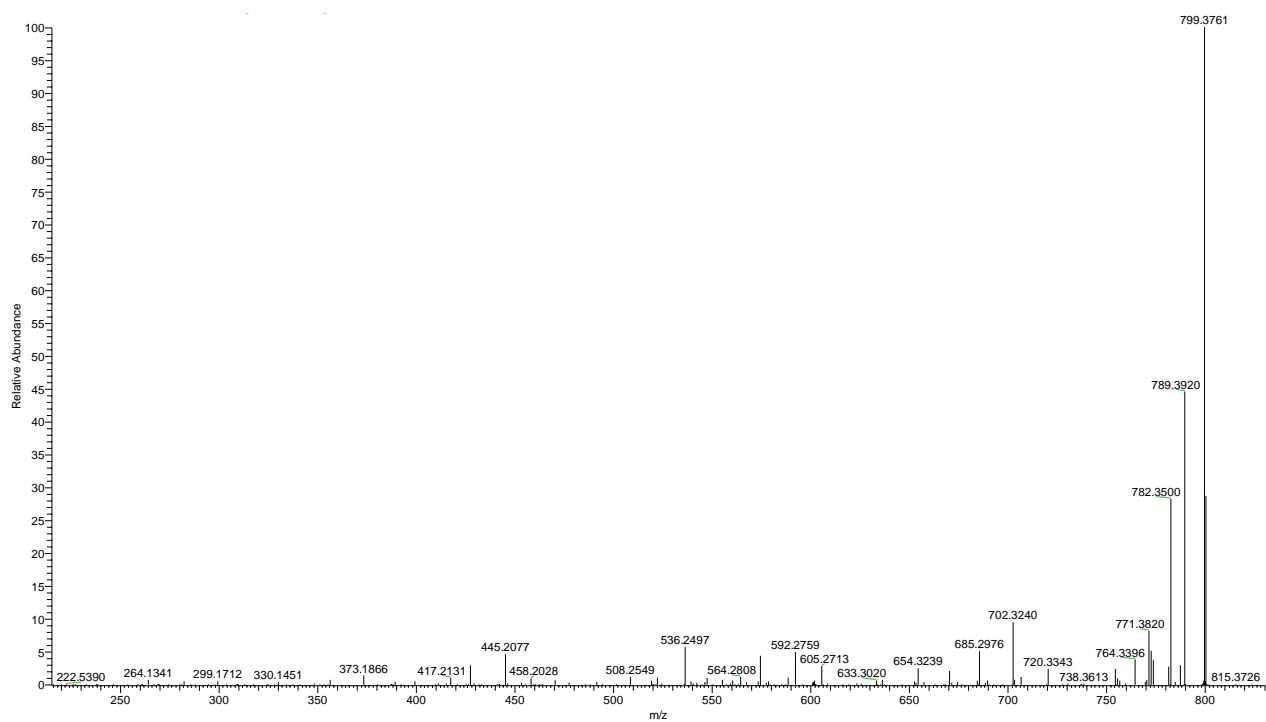

Figure S3. Positive ion mode high-resolution ESI MS/MS spectrum of stylissamide L (1).

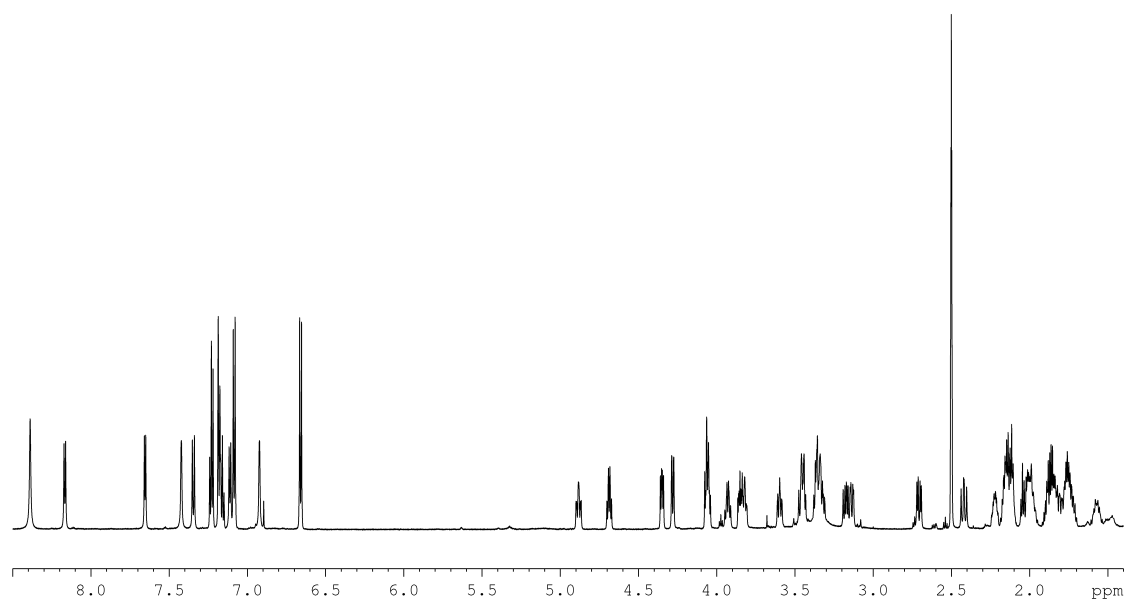

Figure S4.  $^1\text{H}$ -NMR spectrum of stylissamide L (1) (700 MHz,  $\text{DMSO}-d_6$ ).

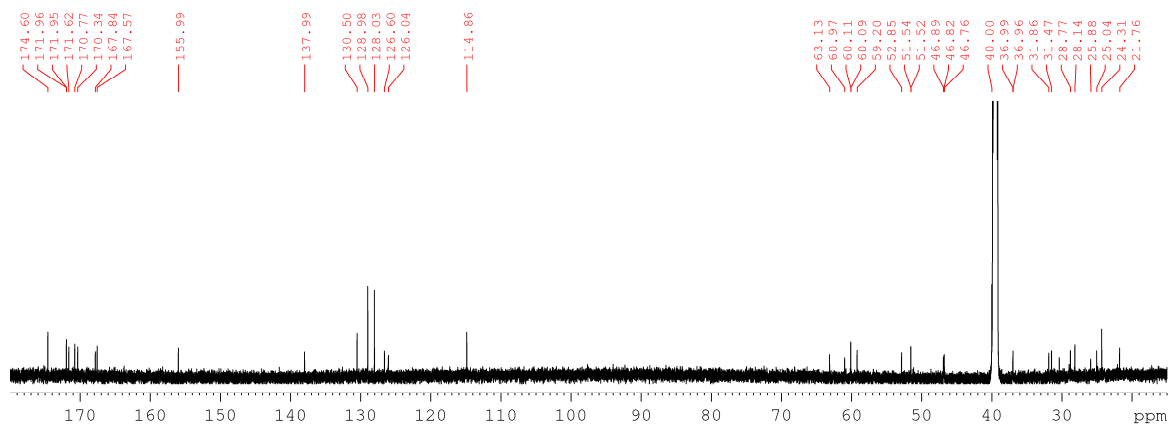

Figure S5.  $^{13}\text{C}$ -NMR spectrum of stylissamide L (1) (175 MHz,  $\text{DMSO}-d_6$ ).

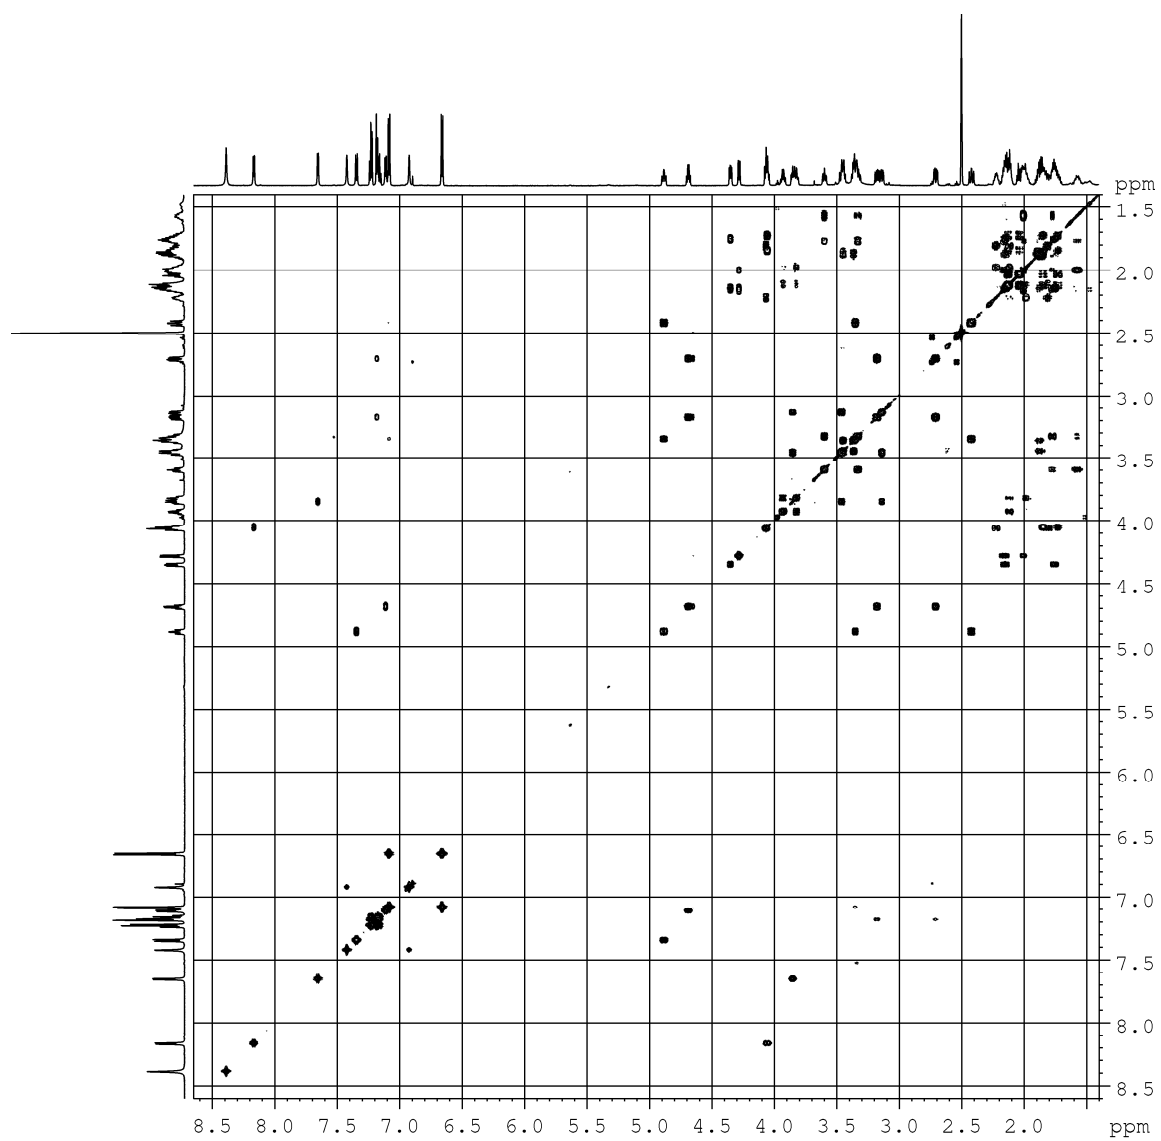

Figure S6. COSY spectrum of stylissamide L (1) (700 MHz, DMSO-*d*<sub>6</sub>).



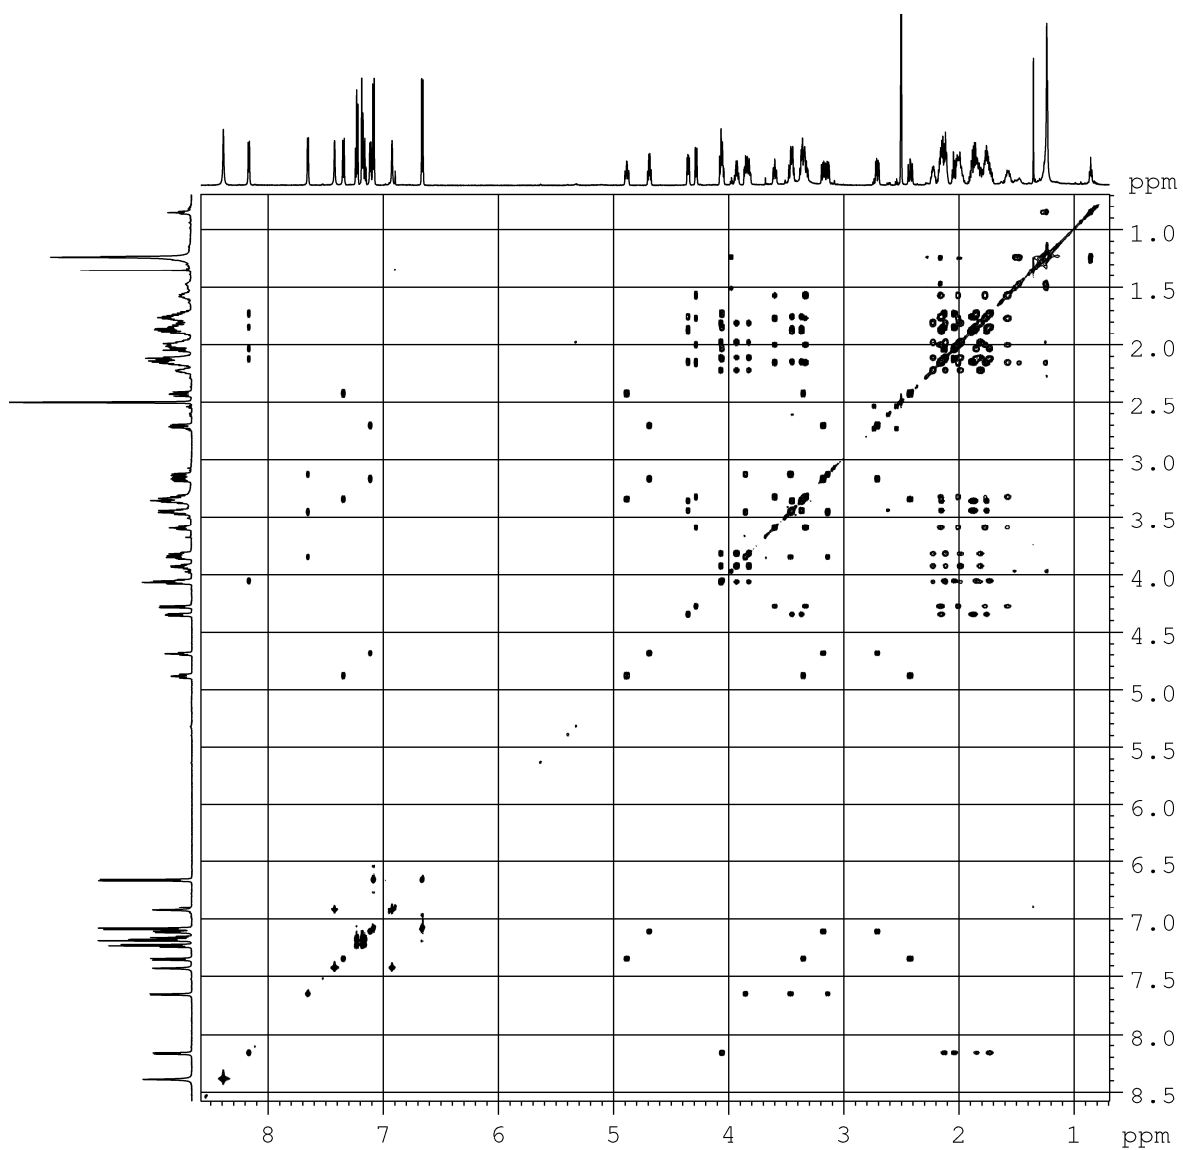

Figure S7. TOCSY spectrum of stylissamide L (1) (700 MHz, DMSO-*d*<sub>6</sub>).

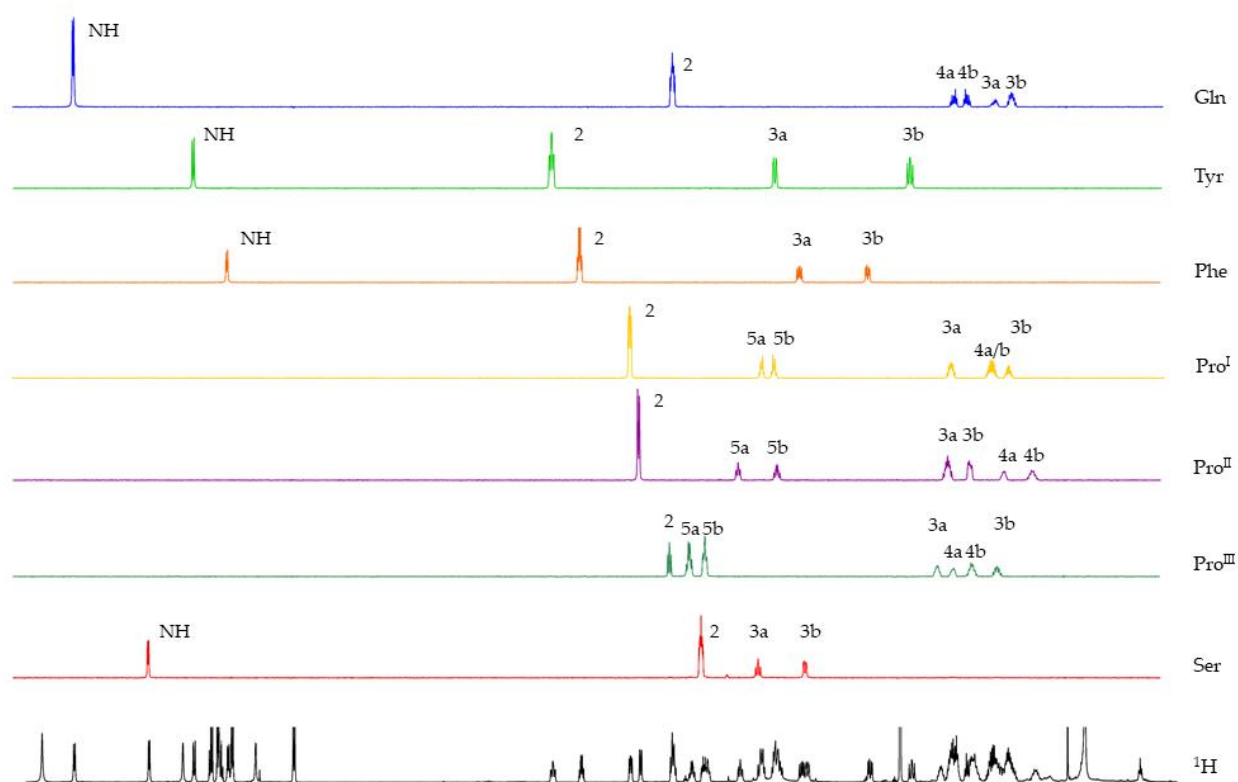

Figure S8. Spin systems of stylissamide L (1) from the sections of the TOCSY spectrum.

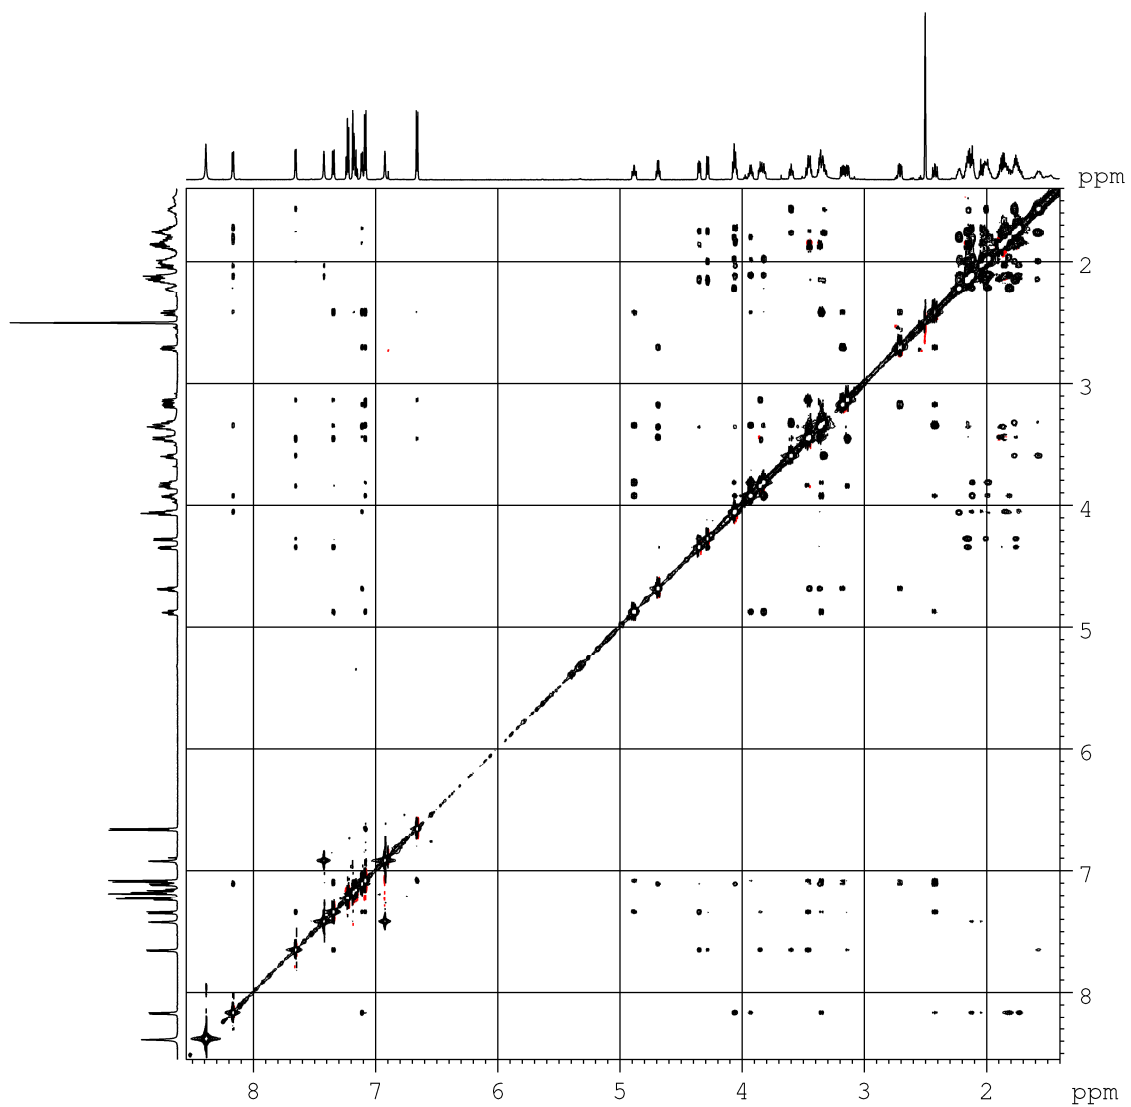

Figure S9. NOESY spectrum of stylissamide L (1) (700 MHz, DMSO- $d_6$ ).

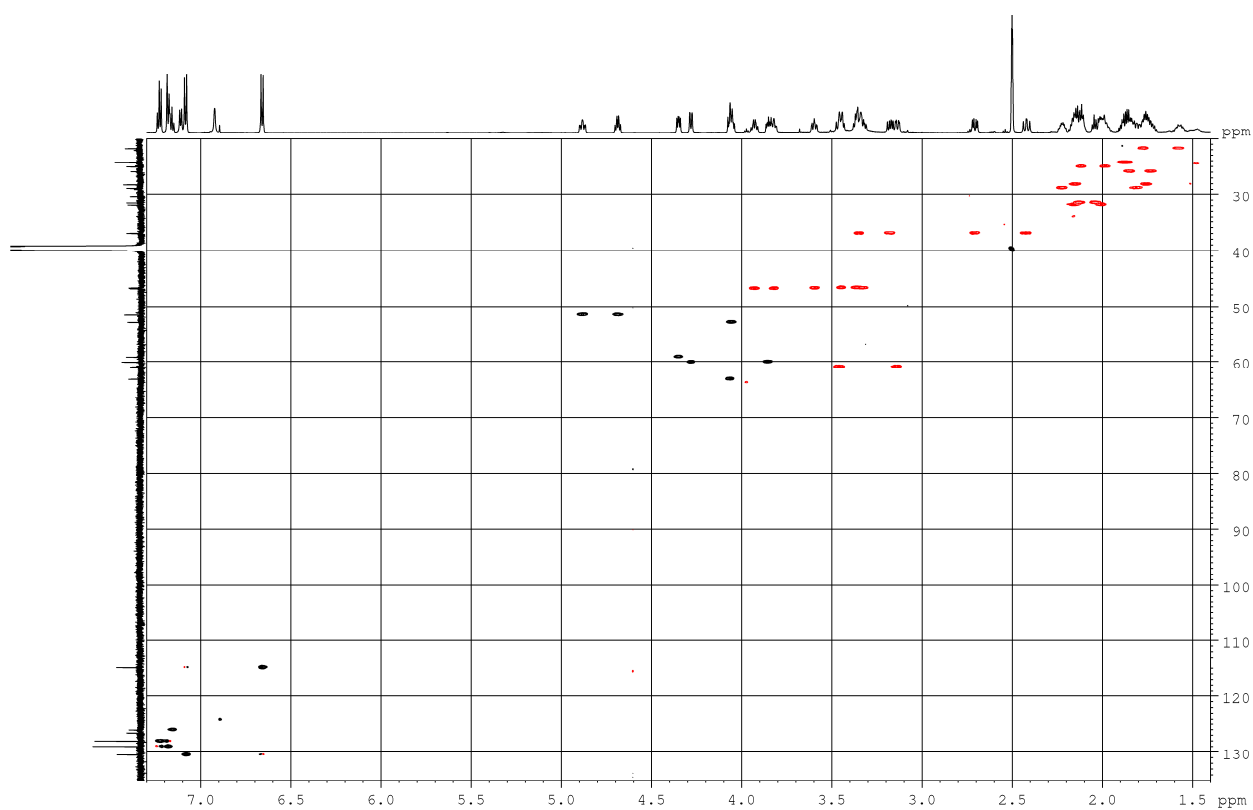

Figure S10. HSQC spectrum of stylissamide L (1) (700 MHz,  $\text{DMSO}-d_6$ ).

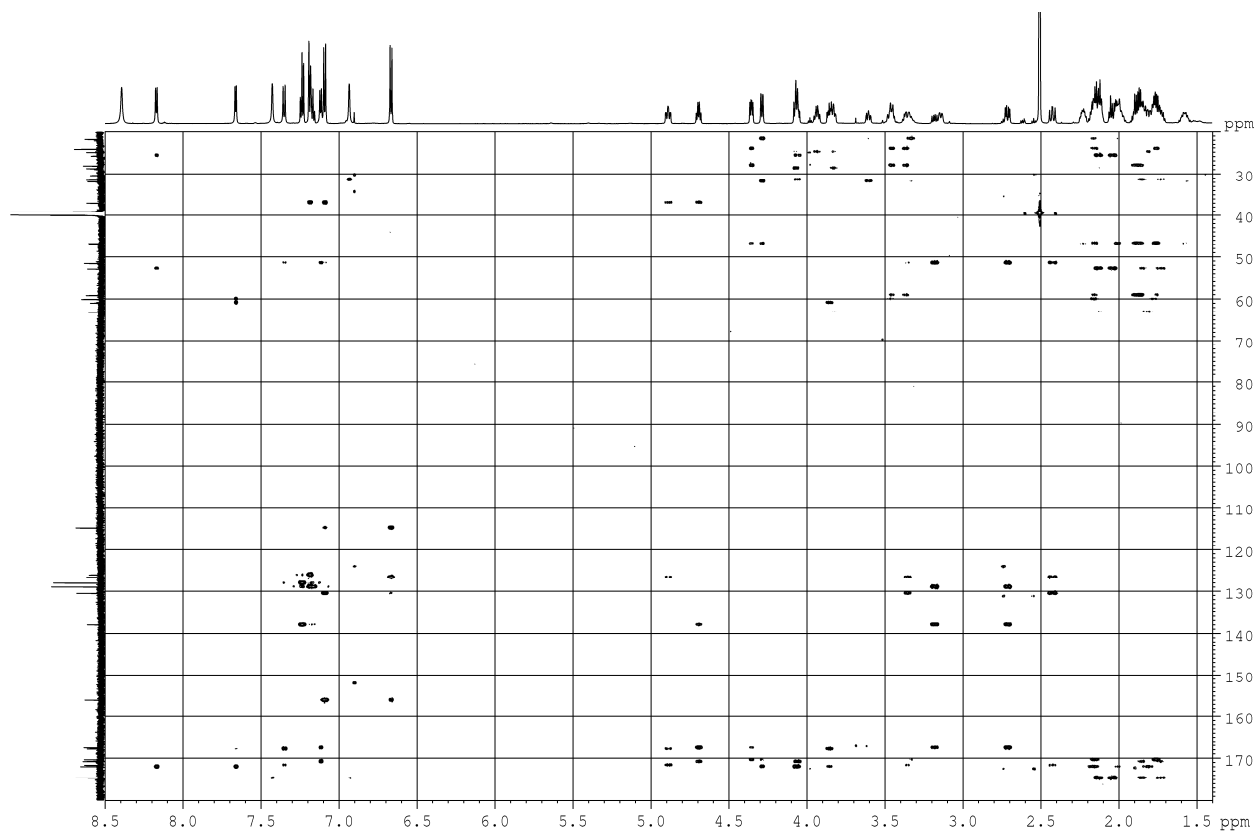

Figure S11. HMBC spectrum of stylissamide L (1) (700 MHz, DMSO- $d_6$ ).

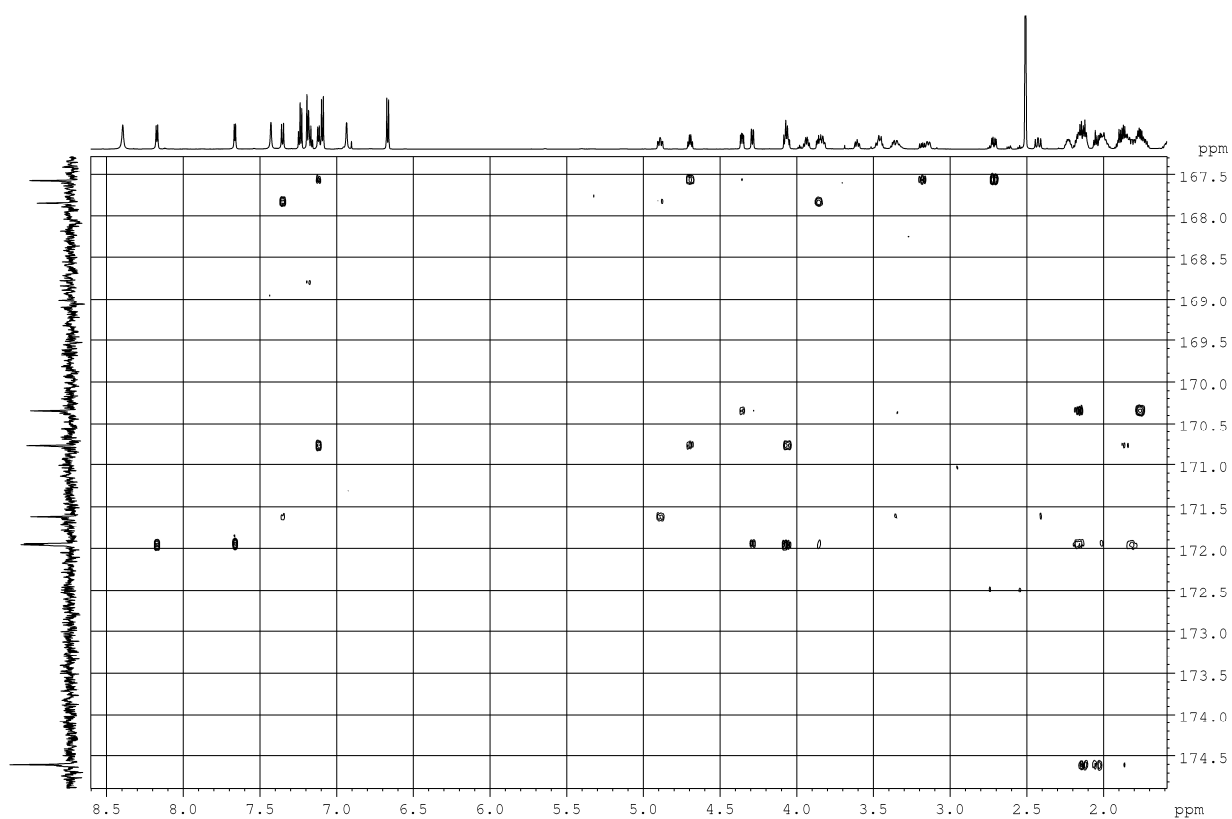

Figure S12. Band-selective HMBC spectrum of stylissamide L (1) (700 MHz,  $\text{DMSO}-d_6$ ).

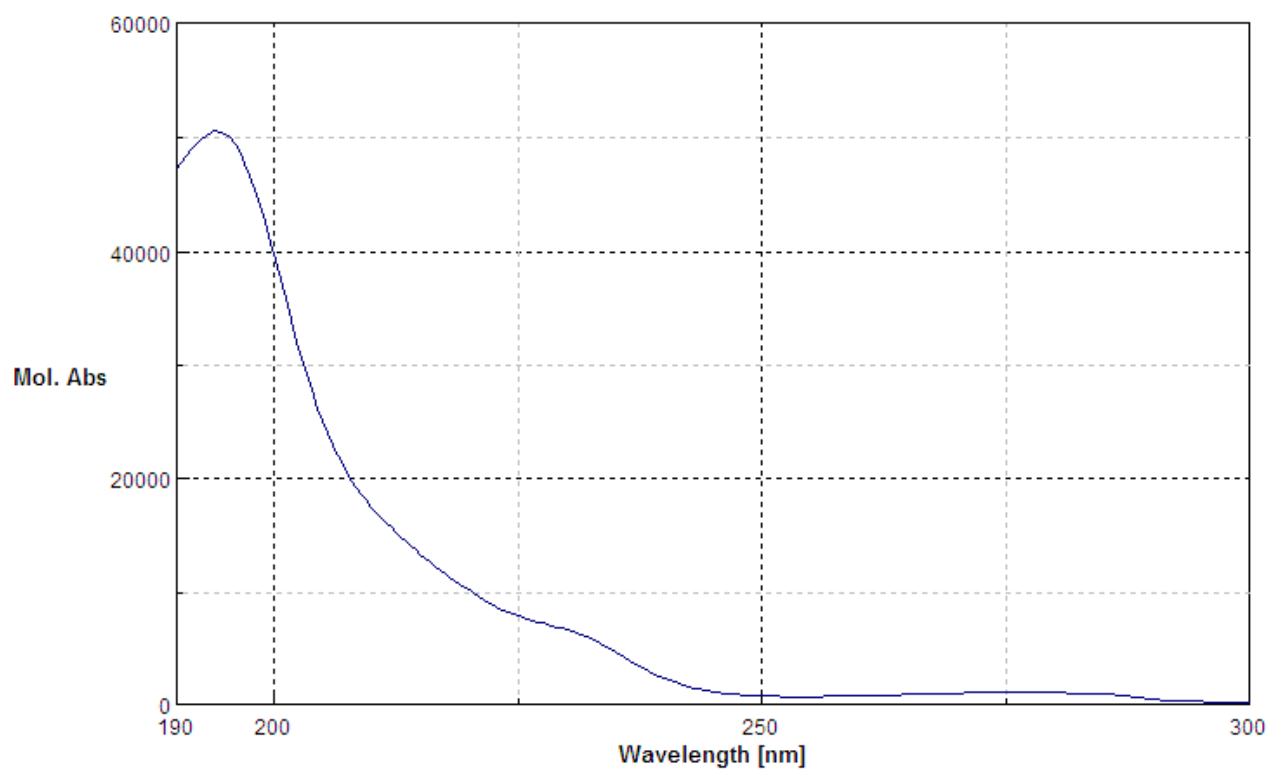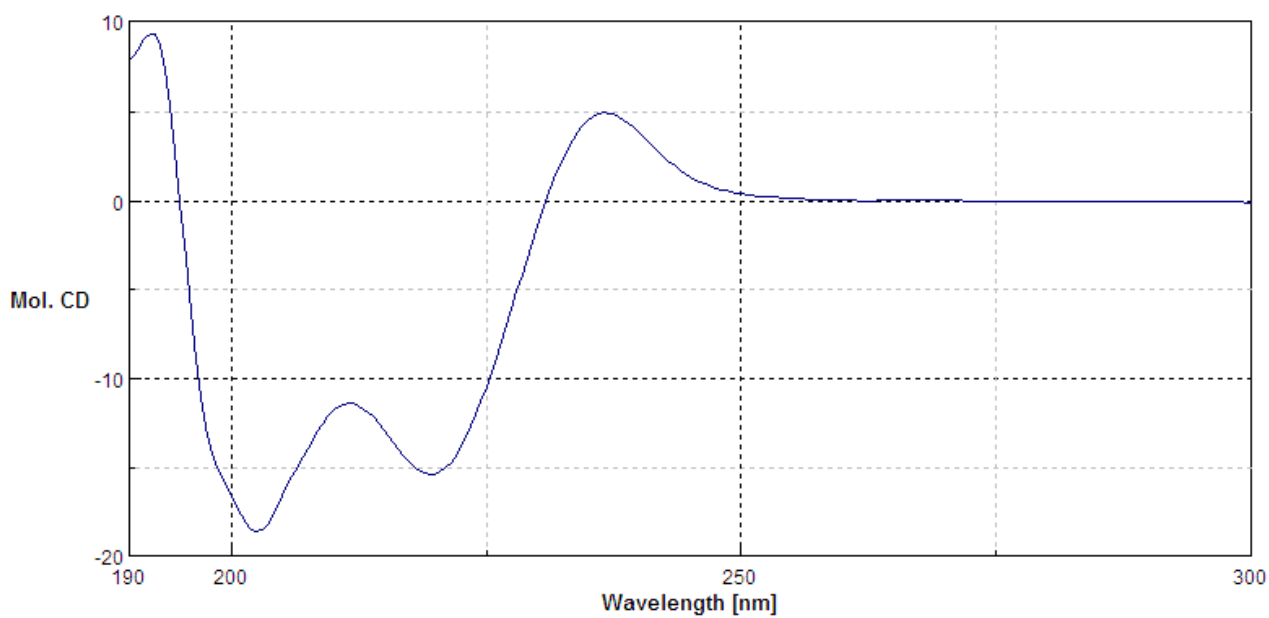

Figure S13. UV and ECD spectra of stylissamide L (1) in ACN.

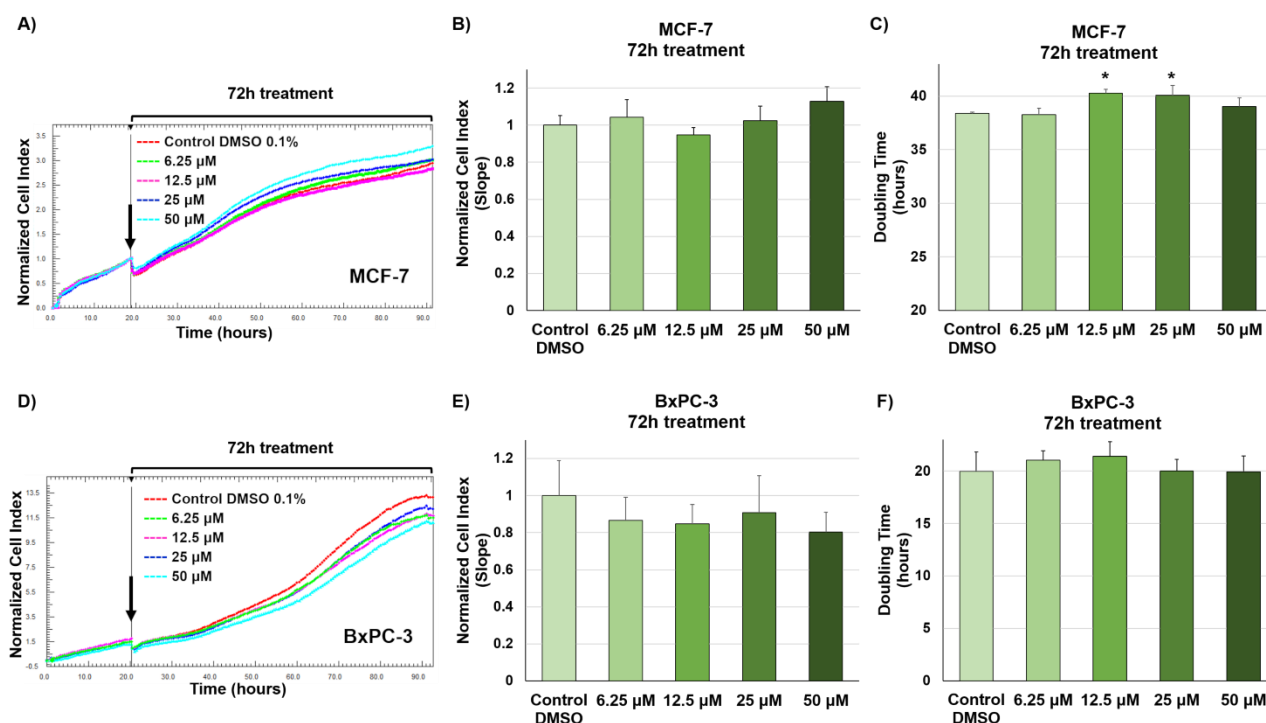

**Figure S14.** Real time monitoring of cancer cell proliferation after exposure to stylissamide L (**1**) and DMSO vehicle, by using the xCELLigence System Real-Time Cell Analyzer. (**A,D**) Normalized cell index (NCI) traces of MCF7 (**A**) and BxPC-3 (**D**) cells treated with different concentrations (6.25, 12.5, 25, and 50  $\mu$ M) of stylissamide L (**1**) and DMSO vehicle (0.1%) for 72 hours. Black arrow shows the start of drug treatment. Each cell index value was normalized at this time. (**B,E**) Slope values of growth curves of MCF-7 (**B**) and BxPC-3 (**E**) cells after 72 h exposure to different concentrations (6.25, 12.5, 25, and 50  $\mu$ M) of stylissamide L (**1**) and DMSO vehicle (0.1%). NCI slope values are relative to controls treated with DMSO vehicle. (**C,F**) Doubling times of NCI of MCF-7 (**C**) and BxPC-3 (**F**) cells after 72 h treatment with different concentrations (6.25, 12.5, 25, and 50  $\mu$ M) of stylissamide L (**1**) and DMSO (0.1%). Data are presented as mean  $\pm$  SD;  $n=3$ . Statistical significances are referred to the DMSO control. One-way analysis of variance (ANOVA) was applied to compare means of groups and Dunnett's method was used as a post-hoc test to compare multiple groups versus the control group.  $p$ -values  $< 0.05$  were considered to be statistically significant. Statistical analysis was performed using the GraphPad Prism Software Version 5. \*  $p < 0.05$ .



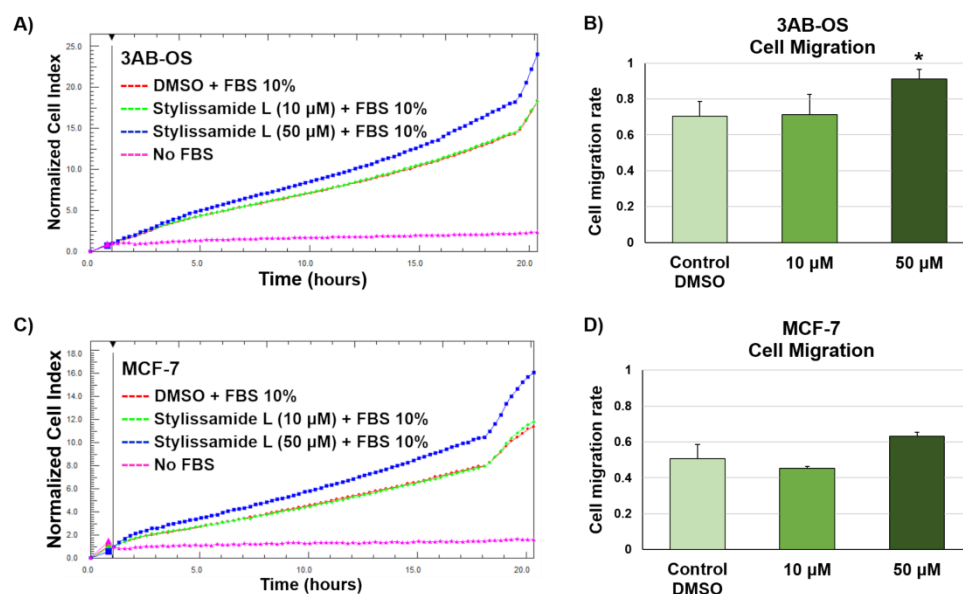

**Figure S15.** Real-time monitoring of 3AB-OS and MCF-7 cell migration after exposure to stylissamide L (**1**). (A,C) NCI traces of 3AB-OS (A) and MCF-7 (C) cells seeded with compound **1** or DMSO (0.1%) vehicle, in presence of 10% Fetal Bovine Serum (FBS) as the chemoattractant. Migration was monitored for 20 hours, using the xCELLigence System equipped with specially designed 16-well plates (CIM-plate 16). (B,D) Migration activity of 3AB-OS (B) and MCF-7 (D) cells seeded with compound **1** or DMSO (0.1%) vehicle, in presence of 10% Fetal Bovine Serum (FBS) as the chemoattractant. Cell migration rates were recorded for 20 hours and expressed as slope values of NCI curves. Data are presented as mean  $\pm$  SD; n=3. Statistical significances are referred to the DMSO control. Two-group comparisons were performed using Student's t-test. P-values < 0.05 were considered to be statistically significant. Statistical analysis was performed using the GraphPad Prism Software Version 5.
